# Supplementary material for: Comparing Patient Risk Factor-, Sequence Type-, and Resistance Locus Identification-Based Approaches for Predicting Antibiotic Resistance in Escherichia coli Bloodstream Infections
Source: PubMed Central journal article supplement (PMC6535602; doi:10.1128/jcm.01780-18), 2019-05-24

**Supplementary Table 1: Hosmer-Lemeshow p-values for evaluated models.**

| Antibiotic Model (N=414)                                                                                                                  | Hosmer-Lemeshow P-value      |                           |
|-------------------------------------------------------------------------------------------------------------------------------------------|------------------------------|---------------------------|
|                                                                                                                                           | Model Without Epi Predictors | Model With Epi Predictors |
| <b>CEFTRIAXONE (Tested=396)</b>                                                                                                           |                              |                           |
| Baseline (Epi predictors Alone)                                                                                                           | -                            | 0.98                      |
| ST**                                                                                                                                      | 1                            | 0.72                      |
| <i>Beta-lactamases</i>                                                                                                                    |                              |                           |
| <i>bla</i> <sub>CTX</sub>                                                                                                                 | 1                            | 0.99                      |
| <i>bla</i> <sub>CTX</sub> + <i>bla</i> <sub>CMY</sub>                                                                                     | 1                            | 0.99                      |
| <i>bla</i> <sub>CTX</sub> + <i>bla</i> <sub>CMY</sub> + <i>bla</i> <sub>OXA</sub>                                                         | 1                            | NA                        |
| <i>bla</i> <sub>CTX</sub> + <i>bla</i> <sub>CMY</sub> + <i>bla</i> <sub>OXA</sub> + <i>bla</i> <sub>TEM</sub>                             | 1                            | 0.78                      |
| <i>bla</i> <sub>CTX</sub> + <i>bla</i> <sub>CMY</sub> + <i>bla</i> <sub>OXA</sub> + <i>bla</i> <sub>TEM</sub> + <i>bla</i> <sub>SHV</sub> | 1                            | 0.82                      |
| <b>CIPROFLOXACIN (Tested=414)</b>                                                                                                         |                              |                           |
| Baseline (Epi predictors alone)                                                                                                           | -                            | 1                         |
| ST**                                                                                                                                      | 1                            | 0.93                      |
| <i>gyrA</i> + <i>parC</i> Mutations                                                                                                       | 1                            | 1                         |
| <b>GENTAMICIN (Tested=414)</b>                                                                                                            |                              |                           |
| Baseline (Epi predictors Alone)                                                                                                           | -                            | 1                         |
| ST**                                                                                                                                      | 1                            | 0.93                      |
| <i>Aminoglycoside Acyl-transferases</i>                                                                                                   |                              |                           |
| <i>aac(3)</i>                                                                                                                             | 1                            | 1                         |
| <i>aac(3)</i> + <i>aac(6)</i>                                                                                                             | 1                            | 1                         |
| <i>aac(3)</i> + <i>aac(6)</i> + <i>aadB</i>                                                                                               | 1                            | 1                         |

Interpret HL p-value with caution given limited number of binary/categorical predictors in some models.

**Supplementary Table 2: Genetic resistance loci identified by isolate and multilocus sequence type (MLST).**



|      |     |     |     |   |   |   |   |   |   |   |   |   |   |
|------|-----|-----|-----|---|---|---|---|---|---|---|---|---|---|
| 28   | S   | S   | S   | 0 | 0 | 0 | 0 | 0 | 0 | 0 | 0 | 0 | 0 |
| 135  | S   | S   | S   | 0 | 0 | 0 | 0 | 0 | 0 | 0 | 0 | 0 | 0 |
| 131  | -   | S   | I+R | 0 | 0 | 0 | 0 | 1 | 0 | 0 | 0 | 1 | 1 |
| 73   | S   | S   | S   | 0 | 0 | 0 | 0 | 0 | 0 | 0 | 0 | 0 | 0 |
| 14   | S   | S   | S   | 0 | 0 | 0 | 0 | 0 | 0 | 0 | 0 | 0 | 0 |
| 95   | S   | S   | S   | 0 | 0 | 0 | 0 | 0 | 0 | 0 | 0 | 0 | 0 |
| 73   | S   | S   | S   | 0 | 0 | 0 | 0 | 0 | 0 | 0 | 0 | 0 | 0 |
| 73   | S   | S   | S   | 0 | 0 | 0 | 0 | 0 | 0 | 0 | 0 | 0 | 0 |
| 1086 | S   | S   | S   | 0 | 0 | 0 | 0 | 0 | 0 | 0 | 0 | 0 | 0 |
| 131  | S   | S   | I+R | 0 | 0 | 0 | 0 | 1 | 0 | 0 | 0 | 1 | 1 |
| 73   | S   | S   | S   | 0 | 0 | 0 | 0 | 0 | 0 | 0 | 0 | 0 | 0 |
| 73   | S   | S   | S   | 0 | 0 | 0 | 0 | 0 | 0 | 0 | 0 | 0 | 0 |
| 1193 | S   | S   | I+R | 0 | 0 | 0 | 0 | 0 | 0 | 0 | 0 | 1 | 1 |
| 131  | -   | S   | I+R | 0 | 0 | 0 | 0 | 1 | 0 | 0 | 0 | 1 | 1 |
| 404  | S   | S   | S   | 0 | 0 | 0 | 0 | 1 | 0 | 0 | 0 | 0 | 0 |
| 73   | S   | S   | S   | 0 | 0 | 0 | 0 | 0 | 0 | 0 | 0 | 0 | 0 |
| 1421 | S   | S   | S   | 0 | 0 | 0 | 0 | 0 | 0 | 0 | 0 | 0 | 0 |
| 127  | S   | S   | S   | 0 | 0 | 0 | 0 | 0 | 0 | 0 | 0 | 0 | 0 |
| 131  | S   | S   | I+R | 0 | 0 | 0 | 0 | 1 | 0 | 0 | 0 | 1 | 1 |
| 127  | S   | S   | S   | 0 | 0 | 0 | 0 | 0 | 0 | 0 | 0 | 0 | 0 |
| 73   | S   | S   | S   | 0 | 0 | 0 | 0 | 0 | 0 | 0 | 0 | 0 | 0 |
| NEW  | S   | S   | S   | 0 | 0 | 0 | 0 | 1 | 0 | 0 | 0 | 0 | 0 |
| 95   | S   | S   | S   | 0 | 0 | 0 | 0 | 0 | 0 | 0 | 0 | 0 | 0 |
| 349  | S   | S   | S   | 0 | 0 | 0 | 0 | 0 | 0 | 0 | 0 | 0 | 0 |
| 131  | -   | I+R | S   | 0 | 0 | 0 | 0 | 1 | 1 | 0 | 0 | 0 | 0 |
| 404  | S   | S   | S   | 0 | 0 | 0 | 0 | 1 | 0 | 0 | 0 | 0 | 0 |
| 69   | S   | S   | S   | 0 | 0 | 0 | 0 | 1 | 0 | 0 | 0 | 0 | 0 |
| 73   | S   | S   | S   | 0 | 0 | 0 | 0 | 0 | 0 | 0 | 0 | 0 | 0 |
| 93   | S   | S   | S   | 0 | 0 | 0 | 0 | 1 | 0 | 0 | 0 | 0 | 0 |
| 131  | I+R | S   | I+R | 0 | 1 | 0 | 0 | 0 | 0 | 0 | 0 | 1 | 1 |
| 131  | I+R | S   | I+R | 0 | 1 | 0 | 0 | 0 | 0 | 0 | 0 | 1 | 1 |
| 131  | S   | I+R | I+R | 0 | 0 | 0 | 0 | 1 | 1 | 0 | 0 | 1 | 1 |
| 1284 | I+R | S   | I+R | 0 | 1 | 0 | 1 | 0 | 0 | 1 | 0 | 1 | 1 |

|      |   |     |     |   |   |   |   |   |   |   |   |   |   |
|------|---|-----|-----|---|---|---|---|---|---|---|---|---|---|
| 95   | S | S   | S   | 0 | 0 | 0 | 0 | 1 | 0 | 0 | 0 | 0 | 0 |
| 95   | S | S   | S   | 0 | 0 | 0 | 0 | 1 | 0 | 0 | 0 | 0 | 0 |
| 95   | - | S   | S   | 0 | 0 | 0 | 0 | 1 | 0 | 0 | 0 | 0 | 0 |
| 144  | S | S   | S   | 0 | 0 | 0 | 0 | 1 | 0 | 0 | 0 | 0 | 0 |
| 363  | S | S   | S   | 0 | 0 | 0 | 0 | 0 | 0 | 0 | 0 | 0 | 0 |
| 73   | S | S   | S   | 0 | 0 | 0 | 0 | 0 | 0 | 0 | 0 | 1 | 0 |
| 58   | S | S   | S   | 0 | 0 | 0 | 0 | 0 | 0 | 0 | 0 | 1 | 0 |
| 73   | S | S   | S   | 0 | 0 | 0 | 0 | 1 | 0 | 0 | 0 | 0 | 0 |
| NEW  | S | S   | S   | 0 | 0 | 0 | 0 | 0 | 0 | 0 | 0 | 0 | 0 |
| 95   | S | S   | S   | 0 | 0 | 0 | 0 | 0 | 0 | 0 | 0 | 0 | 0 |
| 1193 | S | S   | I+R | 0 | 0 | 0 | 0 | 1 | 0 | 0 | 0 | 1 | 1 |
| 131  | S | I+R | I+R | 0 | 0 | 0 | 0 | 1 | 1 | 0 | 0 | 1 | 1 |
| 95   | S | S   | S   | 0 | 0 | 0 | 0 | 0 | 0 | 0 | 0 | 0 | 0 |
| 10   | - | S   | S   | 0 | 0 | 0 | 0 | 0 | 0 | 0 | 0 | 0 | 0 |
| 127  | S | S   | S   | 0 | 0 | 0 | 0 | 0 | 0 | 0 | 0 | 0 | 0 |
| 95   | S | S   | S   | 0 | 0 | 0 | 0 | 0 | 0 | 0 | 0 | 0 | 0 |
| 1193 | S | S   | I+R | 0 | 0 | 0 | 0 | 1 | 0 | 0 | 0 | 1 | 1 |
| 69   | S | I+R | S   | 0 | 0 | 0 | 0 | 1 | 1 | 0 | 0 | 1 | 0 |
| 131  | S | S   | S   | 0 | 0 | 0 | 0 | 0 | 0 | 0 | 0 | 0 | 0 |
| 131  | S | I+R | S   | 0 | 0 | 0 | 1 | 1 | 1 | 1 | 0 | 1 | 0 |
| 73   | S | S   | S   | 0 | 0 | 0 | 0 | 1 | 0 | 0 | 0 | 0 | 0 |
| 7428 | S | S   | S   | 0 | 0 | 0 | 0 | 0 | 0 | 0 | 0 | 0 | 0 |
| 95   | S | S   | S   | 0 | 0 | 0 | 0 | 1 | 0 | 0 | 0 | 0 | 0 |
| 73   | S | S   | S   | 0 | 0 | 0 | 0 | 0 | 0 | 0 | 0 | 0 | 0 |
| 73   | S | S   | S   | 0 | 0 | 0 | 0 | 0 | 0 | 0 | 0 | 0 | 0 |
| 69   | S | S   | S   | 0 | 0 | 0 | 0 | 0 | 0 | 0 | 0 | 0 | 0 |
| 12   | S | S   | S   | 0 | 0 | 1 | 0 | 0 | 0 | 0 | 0 | 1 | 0 |
| 345  | S | S   | S   | 0 | 0 | 0 | 0 | 0 | 0 | 0 | 0 | 0 | 0 |
| 95   | S | S   | S   | 0 | 0 | 0 | 0 | 0 | 0 | 0 | 0 | 0 | 0 |
| 73   | S | S   | S   | 0 | 0 | 0 | 0 | 0 | 0 | 0 | 0 | 0 | 0 |
| 127  | S | S   | S   | 0 | 0 | 0 | 0 | 0 | 0 | 0 | 0 | 0 | 0 |
| 131  | S | S   | S   | 0 | 0 | 0 | 0 | 0 | 0 | 0 | 0 | 0 | 0 |
| 1193 | S | S   | I+R | 0 | 0 | 0 | 0 | 1 | 0 | 0 | 0 | 1 | 1 |

|      |     |     |     |   |   |   |   |   |   |   |   |   |   |
|------|-----|-----|-----|---|---|---|---|---|---|---|---|---|---|
| 95   | S   | S   | S   | 0 | 0 | 0 | 0 | 1 | 0 | 0 | 0 | 0 | 0 |
| 929  | S   | S   | S   | 0 | 0 | 0 | 0 | 0 | 0 | 0 | 0 | 0 | 0 |
| 73   | -   | S   | S   | 0 | 0 | 0 | 0 | 0 | 0 | 0 | 0 | 0 | 0 |
| 131  | S   | I+R | I+R | 0 | 0 | 0 | 0 | 1 | 1 | 0 | 0 | 1 | 1 |
| 69   | S   | I+R | S   | 0 | 0 | 0 | 0 | 1 | 1 | 0 | 0 | 1 | 0 |
| 1262 | S   | S   | S   | 0 | 0 | 0 | 0 | 0 | 0 | 0 | 0 | 0 | 0 |
| 10   | S   | S   | S   | 0 | 0 | 0 | 0 | 0 | 0 | 0 | 0 | 0 | 0 |
| 73   | S   | S   | S   | 0 | 0 | 0 | 0 | 0 | 0 | 0 | 0 | 0 | 0 |
| 38   | S   | S   | I+R | 0 | 0 | 0 | 0 | 0 | 0 | 0 | 0 | 1 | 1 |
| 131  | S   | S   | S   | 0 | 0 | 0 | 0 | 0 | 0 | 0 | 0 | 0 | 0 |
| 73   | S   | S   | S   | 0 | 0 | 0 | 0 | 1 | 0 | 0 | 0 | 0 | 0 |
| 1193 | S   | S   | I+R | 0 | 0 | 0 | 0 | 1 | 0 | 0 | 0 | 1 | 1 |
| 95   | S   | S   | S   | 0 | 0 | 0 | 0 | 1 | 0 | 0 | 0 | 1 | 0 |
| NEW  | -   | S   | S   | 0 | 0 | 0 | 0 | 1 | 0 | 0 | 0 | 0 | 0 |
| 226  | S   | S   | S   | 0 | 0 | 0 | 0 | 1 | 0 | 0 | 0 | 0 | 0 |
| 1057 | S   | S   | S   | 0 | 0 | 0 | 0 | 0 | 0 | 0 | 0 | 0 | 0 |
| 1193 | S   | S   | I+R | 0 | 0 | 0 | 0 | 0 | 0 | 0 | 0 | 1 | 1 |
| 1623 | S   | S   | S   | 0 | 0 | 0 | 0 | 0 | 0 | 0 | 0 | 0 | 0 |
| 131  | S   | S   | I+R | 0 | 0 | 0 | 0 | 1 | 0 | 0 | 0 | 1 | 1 |
| 135  | S   | S   | S   | 0 | 0 | 0 | 0 | 0 | 0 | 0 | 0 | 0 | 0 |
| 46   | S   | I+R | I+R | 0 | 0 | 0 | 0 | 1 | 1 | 0 | 0 | 0 | 0 |
| 357  | S   | S   | S   | 0 | 0 | 0 | 0 | 0 | 0 | 0 | 0 | 0 | 0 |
| 131  | S   | I+R | S   | 0 | 0 | 0 | 0 | 1 | 1 | 0 | 0 | 1 | 0 |
| 12   | S   | S   | S   | 0 | 0 | 0 | 0 | 0 | 0 | 0 | 0 | 0 | 0 |
| 131  | S   | S   | S   | 0 | 0 | 0 | 0 | 1 | 0 | 0 | 0 | 0 | 0 |
| 68   | S   | S   | S   | 0 | 0 | 0 | 0 | 0 | 0 | 0 | 0 | 0 | 0 |
| 95   | S   | S   | S   | 0 | 0 | 0 | 0 | 1 | 0 | 0 | 0 | 1 | 0 |
| 409  | S   | S   | S   | 0 | 0 | 0 | 0 | 0 | 0 | 0 | 0 | 0 | 0 |
| 420  | S   | S   | S   | 0 | 0 | 0 | 0 | 0 | 0 | 0 | 0 | 0 | 0 |
| 46   | S   | S   | S   | 0 | 0 | 0 | 0 | 1 | 0 | 0 | 0 | 0 | 0 |
| 131  | I+R | I+R | I+R | 0 | 1 | 0 | 0 | 0 | 1 | 0 | 0 | 1 | 1 |
| 95   | S   | S   | S   | 0 | 0 | 0 | 0 | 0 | 0 | 0 | 0 | 0 | 0 |
| 4260 | S   | S   | S   | 0 | 0 | 0 | 0 | 1 | 0 | 0 | 0 | 0 | 0 |

|      |     |     |     |   |   |   |   |   |   |   |   |   |   |
|------|-----|-----|-----|---|---|---|---|---|---|---|---|---|---|
| 127  | S   | S   | S   | 0 | 1 | 0 | 0 | 0 | 0 | 1 | 0 | 0 | 0 |
| 131  | I+R | S   | I+R | 0 | 1 | 0 | 1 | 0 | 0 | 1 | 0 | 1 | 1 |
| 95   | S   | S   | S   | 0 | 0 | 0 | 0 | 1 | 0 | 0 | 0 | 0 | 0 |
| 2013 | S   | S   | S   | 0 | 0 | 0 | 0 | 0 | 0 | 0 | 0 | 0 | 0 |
| 95   | S   | S   | S   | 0 | 0 | 0 | 0 | 1 | 0 | 0 | 0 | 1 | 0 |
| 5022 | S   | S   | S   | 0 | 0 | 0 | 0 | 0 | 0 | 0 | 0 | 0 | 0 |
| 131  | I+R | S   | I+R | 0 | 1 | 0 | 0 | 1 | 0 | 0 | 0 | 1 | 1 |
| 69   | S   | S   | S   | 0 | 0 | 0 | 0 | 1 | 0 | 0 | 0 | 1 | 0 |
| 73   | S   | S   | S   | 0 | 0 | 0 | 0 | 0 | 0 | 0 | 0 | 0 | 0 |
| 69   | S   | S   | S   | 0 | 0 | 0 | 0 | 1 | 0 | 0 | 0 | 0 | 0 |
| 1193 | S   | S   | I+R | 0 | 0 | 0 | 0 | 1 | 0 | 0 | 0 | 1 | 1 |
| 131  | S   | I+R | S   | 0 | 0 | 0 | 0 | 1 | 1 | 0 | 0 | 0 | 0 |
| 420  | S   | S   | S   | 0 | 0 | 0 | 0 | 1 | 0 | 0 | 0 | 0 | 0 |
| 131  | S   | S   | S   | 0 | 0 | 0 | 0 | 1 | 0 | 0 | 0 | 0 | 0 |
| 10   | S   | S   | S   | 0 | 0 | 0 | 0 | 1 | 0 | 0 | 0 | 0 | 0 |
| 73   | S   | S   | S   | 0 | 0 | 0 | 1 | 0 | 0 | 0 | 0 | 0 | 0 |
| 62   | S   | S   | S   | 0 | 0 | 0 | 0 | 1 | 0 | 0 | 0 | 0 | 0 |
| 73   | S   | S   | S   | 0 | 0 | 0 | 0 | 0 | 0 | 0 | 0 | 0 | 0 |
| 73   | S   | S   | S   | 0 | 0 | 0 | 0 | 0 | 0 | 0 | 0 | 0 | 0 |
| 393  | S   | S   | I+R | 0 | 0 | 0 | 0 | 1 | 0 | 0 | 0 | 1 | 1 |
| 131  | I+R | S   | I+R | 0 | 1 | 0 | 0 | 1 | 0 | 0 | 0 | 1 | 1 |
| 5022 | S   | S   | S   | 0 | 0 | 0 | 0 | 0 | 0 | 0 | 0 | 0 | 0 |
| 95   | S   | S   | S   | 0 | 0 | 0 | 0 | 0 | 0 | 0 | 0 | 0 | 0 |
| 131  | I+R | S   | I+R | 0 | 1 | 0 | 1 | 1 | 0 | 1 | 0 | 1 | 1 |
| 12   | I+R | S   | S   | 0 | 1 | 0 | 0 | 0 | 0 | 0 | 0 | 1 | 0 |
| 95   | S   | S   | S   | 0 | 0 | 0 | 0 | 0 | 0 | 0 | 0 | 0 | 0 |
| 12   | S   | S   | S   | 0 | 0 | 0 | 0 | 0 | 0 | 0 | 0 | 0 | 0 |
| 68   | S   | S   | S   | 0 | 0 | 0 | 0 | 0 | 0 | 0 | 0 | 0 | 0 |
| 131  | I+R | S   | I+R | 0 | 1 | 0 | 0 | 0 | 0 | 0 | 0 | 1 | 1 |
| 131  | I+R | S   | I+R | 0 | 1 | 0 | 1 | 1 | 0 | 1 | 0 | 1 | 1 |
| NEW  | S   | S   | S   | 0 | 0 | 0 | 0 | 0 | 0 | 0 | 0 | 0 | 1 |
| 95   | S   | S   | S   | 0 | 0 | 0 | 0 | 0 | 0 | 0 | 0 | 0 | 0 |
| 131  | I+R | I+R | I+R | 0 | 1 | 0 | 1 | 1 | 1 | 1 | 0 | 1 | 1 |

|      |     |     |     |   |   |   |   |   |   |   |   |   |   |
|------|-----|-----|-----|---|---|---|---|---|---|---|---|---|---|
| 602  | S   | S   | S   | 0 | 0 | 0 | 0 | 0 | 0 | 0 | 0 | 0 | 0 |
| 144  | S   | S   | S   | 0 | 0 | 0 | 0 | 1 | 0 | 0 | 0 | 0 | 0 |
| 648  | I+R | I+R | I+R | 0 | 1 | 0 | 0 | 0 | 1 | 0 | 0 | 1 | 1 |
| 69   | S   | S   | S   | 0 | 0 | 0 | 0 | 1 | 0 | 0 | 0 | 1 | 0 |
| 58   | I+R | S   | S   | 1 | 0 | 0 | 0 | 1 | 0 | 0 | 0 | 0 | 0 |
| 428  | S   | S   | S   | 0 | 0 | 0 | 0 | 0 | 0 | 0 | 0 | 0 | 0 |
| 59   | S   | S   | S   | 0 | 0 | 0 | 0 | 1 | 0 | 0 | 0 | 0 | 0 |
| 144  | S   | S   | S   | 0 | 0 | 0 | 0 | 0 | 0 | 0 | 0 | 0 | 0 |
| 131  | I+R | S   | I+R | 0 | 1 | 0 | 1 | 1 | 0 | 1 | 0 | 1 | 1 |
| 73   | S   | S   | S   | 0 | 0 | 0 | 0 | 0 | 0 | 0 | 0 | 0 | 0 |
| 141  | S   | S   | S   | 0 | 0 | 0 | 0 | 0 | 0 | 0 | 0 | 0 | 0 |
| 73   | S   | S   | S   | 0 | 0 | 0 | 0 | 0 | 0 | 0 | 0 | 0 | 0 |
| 405  | I+R | S   | I+R | 0 | 1 | 0 | 0 | 0 | 0 | 0 | 0 | 1 | 1 |
| 38   | I+R | S   | I+R | 0 | 1 | 0 | 0 | 0 | 0 | 0 | 0 | 1 | 1 |
| 59   | S   | S   | S   | 0 | 0 | 0 | 0 | 0 | 0 | 0 | 0 | 0 | 0 |
| 69   | S   | S   | S   | 0 | 0 | 0 | 0 | 1 | 0 | 0 | 0 | 0 | 0 |
| 405  | I+R | I+R | I+R | 0 | 1 | 0 | 0 | 1 | 1 | 0 | 0 | 1 | 1 |
| 1161 | S   | S   | S   | 0 | 0 | 0 | 0 | 0 | 0 | 0 | 0 | 0 | 0 |
| 131  | S   | I+R | S   | 0 | 0 | 0 | 0 | 1 | 1 | 0 | 0 | 1 | 0 |
| 1193 | S   | S   | I+R | 0 | 0 | 0 | 0 | 1 | 0 | 0 | 0 | 1 | 1 |
| 95   | S   | S   | S   | 0 | 0 | 0 | 0 | 0 | 0 | 0 | 0 | 0 | 0 |
| 73   | S   | S   | S   | 0 | 0 | 0 | 0 | 0 | 0 | 0 | 0 | 0 | 0 |
| NEW  | S   | S   | S   | 0 | 0 | 0 | 0 | 0 | 0 | 0 | 0 | 0 | 0 |
| 131  | S   | S   | S   | 0 | 0 | 0 | 0 | 1 | 0 | 0 | 0 | 1 | 0 |
| 131  | S   | S   | I+R | 0 | 0 | 0 | 0 | 1 | 0 | 0 | 0 | 1 | 1 |
| 95   | S   | S   | S   | 0 | 0 | 0 | 0 | 1 | 0 | 0 | 0 | 0 | 0 |
| 73   | S   | S   | S   | 0 | 0 | 1 | 0 | 0 | 0 | 0 | 0 | 0 | 0 |
| -    | I+R | I+R | S   | - | - | - | - | - | - | - | - | - | - |
| 491  | S   | S   | S   | 0 | 0 | 0 | 0 | 0 | 0 | 0 | 0 | 0 | 0 |
| 1598 | I+R | S   | S   | 0 | 1 | 0 | 0 | 0 | 0 | 0 | 0 | 0 | 0 |
| 131  | S   | S   | I+R | 0 | 0 | 0 | 0 | 0 | 0 | 0 | 0 | 1 | 1 |
| 73   | S   | S   | S   | 0 | 0 | 1 | 0 | 0 | 0 | 0 | 0 | 0 | 0 |
| 73   | S   | S   | S   | 0 | 0 | 1 | 0 | 0 | 0 | 0 | 0 | 0 | 0 |





|      |     |     |     |   |   |   |   |   |   |   |   |   |   |   |
|------|-----|-----|-----|---|---|---|---|---|---|---|---|---|---|---|
| 135  | S   | S   | S   | 0 | 0 | 0 | 0 | 0 | 0 | 0 | 0 | 0 | 0 | 0 |
| 95   | S   | I+R | S   | 0 | 0 | 0 | 0 | 0 | 1 | 0 | 0 | 0 | 1 | 0 |
| 62   | S   | S   | S   | 0 | 0 | 0 | 0 | 0 | 0 | 0 | 0 | 0 | 0 | 0 |
| 95   | S   | S   | S   | 0 | 0 | 0 | 0 | 0 | 0 | 0 | 0 | 0 | 0 | 0 |
| 127  | S   | I+R | S   | 0 | 0 | 0 | 0 | 1 | 0 | 0 | 0 | 0 | 0 | 0 |
| 131  | S   | S   | I+R | 0 | 0 | 0 | 0 | 1 | 0 | 0 | 0 | 0 | 1 | 1 |
| 95   | S   | S   | S   | 0 | 0 | 0 | 0 | 1 | 0 | 0 | 0 | 0 | 1 | 0 |
| 919  | S   | S   | S   | 0 | 0 | 0 | 0 | 0 | 0 | 0 | 0 | 0 | 0 | 0 |
| 95   | S   | S   | S   | 0 | 0 | 0 | 0 | 0 | 0 | 0 | 0 | 0 | 0 | 0 |
| 131  | S   | S   | I+R | 0 | 0 | 0 | 0 | 1 | 0 | 0 | 0 | 0 | 1 | 1 |
| 80   | S   | S   | S   | 0 | 0 | 0 | 0 | 0 | 0 | 0 | 0 | 0 | 0 | 0 |
| 617  | I+R | S   | I+R | 0 | 1 | 0 | 0 | 0 | 0 | 0 | 0 | 0 | 1 | 1 |
| 90   | S   | I+R | I+R | 0 | 0 | 0 | 0 | 0 | 1 | 0 | 0 | 0 | 1 | 1 |
| 1193 | S   | I+R | I+R | 0 | 0 | 0 | 0 | 1 | 1 | 0 | 0 | 0 | 1 | 1 |
| 95   | S   | S   | S   | 0 | 0 | 0 | 0 | 0 | 0 | 0 | 0 | 0 | 0 | 0 |
| 93   | S   | S   | S   | 0 | 0 | 0 | 0 | 0 | 0 | 0 | 0 | 0 | 0 | 0 |
| 297  | S   | S   | S   | 0 | 0 | 0 | 0 | 0 | 0 | 0 | 0 | 0 | 0 | 0 |
| 131  | S   | S   | S   | 0 | 0 | 0 | 0 | 1 | 0 | 0 | 0 | 0 | 0 | 0 |
| 648  | I+R | S   | I+R | 0 | 1 | 0 | 1 | 0 | 0 | 1 | 0 | 0 | 1 | 1 |
| 127  | S   | S   | S   | 0 | 0 | 0 | 0 | 0 | 0 | 0 | 0 | 0 | 0 | 0 |
| 127  | S   | S   | S   | 0 | 0 | 0 | 0 | 0 | 0 | 0 | 0 | 0 | 1 | 0 |
| 73   | S   | S   | S   | 0 | 0 | 0 | 0 | 0 | 0 | 0 | 0 | 0 | 0 | 0 |
| 95   | S   | S   | S   | 0 | 0 | 0 | 0 | 0 | 0 | 0 | 0 | 0 | 1 | 0 |
| 69   | S   | S   | S   | 0 | 0 | 0 | 0 | 0 | 0 | 0 | 0 | 0 | 0 | 1 |
| 95   | S   | S   | S   | 0 | 0 | 0 | 0 | 1 | 0 | 0 | 0 | 0 | 0 | 0 |
| 131  | I+R | S   | I+R | 0 | 1 | 0 | 1 | 0 | 0 | 1 | 0 | 0 | 1 | 1 |
| 12   | S   | S   | S   | 0 | 0 | 1 | 0 | 0 | 0 | 0 | 0 | 0 | 0 | 0 |
| 95   | S   | S   | S   | 0 | 0 | 0 | 0 | 0 | 0 | 0 | 0 | 0 | 0 | 0 |
| 648  | S   | I+R | I+R | 0 | 0 | 0 | 0 | 1 | 1 | 0 | 0 | 0 | 1 | 1 |
| 73   | S   | S   | S   | 0 | 0 | 1 | 0 | 0 | 0 | 0 | 0 | 0 | 0 | 0 |
| 131  | S   | S   | I+R | 0 | 0 | 0 | 0 | 0 | 0 | 0 | 0 | 0 | 1 | 1 |
| 131  | S   | S   | I+R | 0 | 0 | 0 | 0 | 1 | 0 | 0 | 0 | 0 | 1 | 1 |
| 1177 | S   | S   | S   | 0 | 0 | 0 | 0 | 1 | 0 | 0 | 0 | 0 | 1 | 1 |

|      |     |     |     |   |   |   |   |   |   |   |   |   |   |   |
|------|-----|-----|-----|---|---|---|---|---|---|---|---|---|---|---|
| 131  | S   | S   | I+R | 0 | 0 | 0 | 0 | 0 | 0 | 0 | 0 | 0 | 1 | 1 |
| 131  | S   | S   | I+R | 0 | 0 | 0 | 0 | 0 | 0 | 0 | 0 | 0 | 1 | 1 |
| 95   | S   | S   | S   | 0 | 0 | 0 | 0 | 0 | 0 | 0 | 0 | 0 | 0 | 0 |
| 131  | S   | S   | I+R | 0 | 0 | 0 | 0 | 0 | 0 | 0 | 0 | 0 | 1 | 1 |
| 131  | S   | S   | I+R | 0 | 0 | 0 | 0 | 1 | 0 | 0 | 0 | 0 | 1 | 1 |
| 95   | S   | S   | S   | 0 | 0 | 0 | 0 | 0 | 0 | 0 | 0 | 0 | 0 | 0 |
| 95   | S   | S   | S   | 0 | 0 | 0 | 0 | 0 | 0 | 0 | 0 | 0 | 0 | 0 |
| 69   | S   | S   | S   | 0 | 0 | 0 | 0 | 1 | 0 | 0 | 0 | 0 | 0 | 0 |
| 73   | S   | S   | S   | 0 | 0 | 0 | 0 | 0 | 0 | 0 | 0 | 0 | 0 | 0 |
| 62   | S   | S   | S   | 0 | 0 | 0 | 0 | 0 | 0 | 0 | 0 | 0 | 0 | 0 |
| 1193 | S   | S   | I+R | 0 | 0 | 0 | 0 | 1 | 0 | 0 | 0 | 0 | 1 | 1 |
| 69   | S   | S   | S   | 0 | 0 | 0 | 0 | 1 | 0 | 0 | 0 | 0 | 0 | 0 |
| 1231 | S   | S   | S   | 0 | 0 | 0 | 0 | 0 | 0 | 0 | 0 | 0 | 0 | 0 |
| 648  | S   | S   | S   | 0 | 0 | 0 | 0 | 0 | 0 | 0 | 0 | 0 | 0 | 0 |
| 93   | S   | S   | S   | 0 | 0 | 0 | 0 | 0 | 0 | 0 | 0 | 0 | 0 | 0 |
| 6975 | S   | S   | S   | 0 | 0 | 0 | 0 | 0 | 0 | 0 | 0 | 0 | 0 | 0 |
| 538  | S   | S   | S   | 0 | 0 | 0 | 0 | 0 | 0 | 0 | 0 | 0 | 0 | 0 |
| 648  | I+R | I+R | I+R | 0 | 1 | 0 | 1 | 1 | 1 | 1 | 0 | 0 | 1 | 1 |
| 95   | S   | S   | S   | 0 | 0 | 0 | 0 | 0 | 0 | 0 | 0 | 0 | 0 | 0 |
| -    | I+R | I+R | I+R | 0 | 0 | 1 | 0 | 0 | 0 | 0 | 0 | 0 | - | - |
| 95   | S   | S   | S   | 0 | 0 | 0 | 0 | 1 | 0 | 0 | 0 | 0 | 0 | 0 |
| 69   | S   | S   | S   | 0 | 0 | 0 | 0 | 1 | 0 | 0 | 0 | 0 | 0 | 0 |
| 73   | S   | S   | S   | 0 | 0 | 0 | 0 | 0 | 0 | 0 | 0 | 0 | 0 | 0 |
| 1882 | S   | S   | S   | 0 | 0 | 0 | 0 | 0 | 0 | 0 | 0 | 0 | 0 | 0 |
| 349  | S   | S   | S   | 0 | 0 | 0 | 0 | 1 | 0 | 0 | 0 | 0 | 0 | 0 |
| 131  | S   | S   | I+R | 0 | 0 | 0 | 0 | 1 | 0 | 0 | 0 | 0 | 1 | 1 |
| 547  | S   | S   | S   | 0 | 0 | 0 | 0 | 0 | 0 | 0 | 0 | 0 | 0 | 0 |
| 59   | S   | S   | S   | 0 | 0 | 0 | 0 | 0 | 0 | 0 | 0 | 0 | 0 | 0 |
| NEW  | S   | S   | S   | 1 | 0 | 0 | 0 | 0 | 0 | 0 | 0 | 0 | 0 | 0 |
| 537  | S   | S   | S   | 0 | 0 | 0 | 0 | 0 | 0 | 0 | 0 | 0 | 0 | 0 |
| 131  | S   | I+R | I+R | 0 | 0 | 0 | 0 | 1 | 1 | 0 | 0 | 0 | 1 | 1 |
| 95   | S   | S   | S   | 0 | 0 | 0 | 0 | 0 | 0 | 0 | 0 | 0 | 0 | 0 |
| 10   | S   | S   | S   | 0 | 0 | 0 | 0 | 1 | 0 | 0 | 0 | 0 | 0 | 0 |

|      |     |     |     |   |   |   |   |   |   |   |   |   |   |
|------|-----|-----|-----|---|---|---|---|---|---|---|---|---|---|
| 405  | S   | S   | I+R | 0 | 0 | 0 | 0 | 1 | 0 | 0 | 0 | 1 | 1 |
| 127  | S   | S   | S   | 0 | 0 | 0 | 0 | 0 | 0 | 0 | 0 | 0 | 0 |
| 131  | I+R | I+R | I+R | 0 | 1 | 0 | 1 | 0 | 1 | 1 | 0 | 1 | 1 |
| 3045 | S   | S   | S   | 0 | 0 | 0 | 0 | 0 | 0 | 0 | 0 | 0 | 0 |
| 73   | S   | S   | S   | 0 | 0 | 0 | 0 | 0 | 0 | 0 | 0 | 0 | 0 |
| 131  | S   | S   | S   | 0 | 0 | 0 | 0 | 1 | 0 | 0 | 0 | 1 | 0 |
| 73   | S   | S   | S   | 0 | 0 | 0 | 0 | 0 | 0 | 0 | 0 | 0 | 0 |
| 1193 | S   | I+R | I+R | 0 | 0 | 0 | 0 | 1 | 1 | 0 | 0 | 1 | 1 |
| 421  | S   | S   | S   | 0 | 0 | 0 | 0 | 0 | 0 | 0 | 0 | 0 | 0 |
| 131  | S   | S   | I+R | 0 | 0 | 0 | 0 | 1 | 0 | 0 | 0 | 1 | 1 |
| 1193 | S   | S   | I+R | 0 | 0 | 0 | 0 | 1 | 0 | 0 | 0 | 1 | 1 |
| 537  | S   | S   | S   | 0 | 0 | 0 | 0 | 0 | 0 | 0 | 0 | 0 | 0 |
| 95   | S   | S   | S   | 0 | 0 | 0 | 0 | 0 | 0 | 0 | 0 | 0 | 0 |
| 131  | S   | S   | I+R | 0 | 0 | 0 | 0 | 0 | 0 | 0 | 0 | 1 | 1 |
| 393  | S   | S   | I+R | 0 | 0 | 0 | 0 | 0 | 0 | 0 | 0 | 1 | 1 |
| 95   | S   | S   | S   | 0 | 0 | 0 | 0 | 0 | 0 | 0 | 0 | 0 | 0 |
| 1844 | S   | S   | S   | 0 | 0 | 0 | 0 | 0 | 0 | 0 | 0 | 0 | 0 |
| 131  | S   | I+R | I+R | 0 | 0 | 0 | 0 | 1 | 1 | 0 | 0 | 1 | 1 |
| 127  | S   | S   | S   | 0 | 0 | 0 | 0 | 0 | 0 | 0 | 0 | 0 | 0 |
| 69   | S   | S   | S   | 0 | 0 | 0 | 0 | 1 | 0 | 0 | 0 | 0 | 0 |
| NEW  | S   | S   | S   | 0 | 0 | 0 | 0 | 0 | 0 | 0 | 0 | 0 | 0 |
| 73   | S   | S   | S   | 0 | 0 | 0 | 0 | 1 | 0 | 0 | 0 | 0 | 0 |
| 73   | S   | S   | S   | 0 | 0 | 0 | 0 | 0 | 0 | 0 | 0 | 0 | 0 |
| NEW  | I+R | S   | S   | 0 | 1 | 0 | 0 | 0 | 0 | 0 | 0 | 0 | 0 |
| 491  | S   | S   | S   | 0 | 0 | 0 | 0 | 0 | 0 | 0 | 0 | 0 | 0 |
| 95   | S   | S   | I+R | 0 | 0 | 0 | 0 | 1 | 1 | 0 | 0 | 1 | 1 |
| 73   | S   | S   | S   | 0 | 0 | 0 | 0 | 1 | 0 | 0 | 0 | 0 | 0 |
| 69   | S   | S   | S   | 0 | 0 | 0 | 0 | 1 | 0 | 0 | 0 | 0 | 0 |
| 73   | S   | S   | S   | 0 | 0 | 0 | 0 | 0 | 0 | 0 | 0 | 0 | 0 |
| 73   | S   | S   | S   | 0 | 0 | 0 | 0 | 1 | 0 | 0 | 0 | 0 | 0 |
| 95   | S   | S   | S   | 0 | 0 | 0 | 0 | 0 | 0 | 0 | 0 | 0 | 0 |
| 10   | S   | S   | I+R | 0 | 0 | 0 | 0 | 1 | 0 | 0 | 0 | 1 | 1 |
| 95   | S   | S   | S   | 0 | 0 | 0 | 0 | 1 | 0 | 0 | 0 | 0 | 0 |



|      |     |     |     |   |   |   |   |   |   |   |   |   |   |
|------|-----|-----|-----|---|---|---|---|---|---|---|---|---|---|
| 131  | S   | S   | I+R | 0 | 0 | 0 | 0 | 1 | 0 | 0 | 0 | 1 | 1 |
| 131  | S   | S   | S   | 0 | 0 | 0 | 0 | 1 | 0 | 0 | 0 | 0 | 0 |
| 127  | S   | S   | S   | 0 | 0 | 0 | 0 | 0 | 0 | 0 | 0 | 0 | 0 |
| 131  | S   | I+R | I+R | 0 | 0 | 0 | 0 | 1 | 1 | 0 | 0 | 1 | 1 |
| 131  | S   | S   | S   | 0 | 0 | 0 | 0 | 1 | 0 | 0 | 0 | 0 | 0 |
| 410  | I+R | S   | I+R | 1 | 0 | 0 | 1 | 1 | 0 | 0 | 0 | 1 | 1 |
| 95   | I+R | S   | S   | 1 | 0 | 0 | 0 | 0 | 0 | 0 | 0 | 0 | 0 |
| 95   | S   | S   | S   | 0 | 0 | 0 | 0 | 1 | 0 | 0 | 0 | 0 | 0 |
| 416  | -   | S   | S   | 0 | 0 | 0 | 0 | 0 | 0 | 0 | 0 | 0 | 0 |
| 95   | S   | S   | S   | 0 | 0 | 0 | 0 | 0 | 0 | 0 | 0 | 0 | 0 |
| 1415 | S   | S   | S   | 0 | 0 | 0 | 0 | 0 | 0 | 0 | 0 | 0 | 0 |
| 393  | S   | I+R | I+R | 0 | 0 | 0 | 0 | 1 | 1 | 0 | 0 | 1 | 1 |
| 95   | S   | S   | S   | 0 | 0 | 0 | 0 | 0 | 0 | 0 | 0 | 0 | 0 |
| 3672 | S   | S   | S   | 0 | 0 | 0 | 0 | 0 | 0 | 0 | 0 | 0 | 0 |
| 127  | S   | S   | S   | 0 | 0 | 0 | 0 | 0 | 0 | 0 | 0 | 0 | 0 |
| 131  | I+R | S   | I+R | 0 | 1 | 0 | 0 | 0 | 0 | 0 | 0 | 1 | 1 |
| 998  | I+R | S   | S   | 0 | 1 | 0 | 1 | 1 | 0 | 1 | 1 | 1 | 0 |
| 405  | I+R | I+R | I+R | 1 | 0 | 0 | 0 | 1 | 0 | 0 | 1 | 1 | 1 |
| 69   | S   | S   | S   | 0 | 0 | 0 | 0 | 1 | 0 | 0 | 0 | 0 | 0 |
| 127  | -   | S   | S   | 0 | 0 | 0 | 0 | 0 | 0 | 0 | 0 | 0 | 0 |
| 131  | S   | I+R | I+R | 0 | 0 | 0 | 0 | 1 | 1 | 0 | 0 | 1 | 1 |
| 405  | I+R | I+R | I+R | 1 | 0 | 0 | 0 | 1 | 0 | 0 | 1 | 1 | 1 |
| 131  | I+R | S   | I+R | 0 | 1 | 0 | 1 | 0 | 0 | 1 | 0 | 1 | 1 |
| 95   | S   | S   | S   | 0 | 0 | 0 | 0 | 0 | 0 | 0 | 0 | 1 | 0 |
| 405  | I+R | I+R | I+R | 1 | 0 | 0 | 0 | 1 | 0 | 0 | 1 | 1 | 1 |
| 131  | S   | S   | S   | 0 | 0 | 0 | 0 | 1 | 0 | 0 | 0 | 1 | 0 |
| 73   | S   | S   | S   | 0 | 0 | 0 | 0 | 0 | 0 | 0 | 0 | 0 | 0 |
| 127  | S   | S   | S   | 0 | 0 | 0 | 0 | 0 | 0 | 0 | 0 | 0 | 0 |
| 131  | S   | I+R | S   | 0 | 0 | 0 | 0 | 1 | 1 | 0 | 0 | 1 | 0 |
| 93   | I+R | I+R | S   | 1 | 0 | 0 | 0 | 0 | 1 | 0 | 0 | 0 | 0 |
| 59   | -   | S   | S   | 0 | 0 | 0 | 0 | 0 | 0 | 0 | 0 | 0 | 0 |
| 131  | S   | I+R | S   | 0 | 0 | 0 | 0 | 1 | 1 | 0 | 0 | 1 | 0 |
| 38   | I+R | S   | I+R | 0 | 1 | 0 | 0 | 0 | 0 | 0 | 0 | 1 | 1 |

|      |     |     |     |   |   |   |   |   |   |   |   |   |   |
|------|-----|-----|-----|---|---|---|---|---|---|---|---|---|---|
| 10   | S   | S   | S   | 0 | 0 | 0 | 0 | 0 | 0 | 0 | 0 | 0 | 0 |
| 95   | S   | S   | S   | 0 | 0 | 0 | 0 | 0 | 0 | 0 | 0 | 0 | 0 |
| 131  | I+R | S   | S   | 1 | 0 | 0 | 0 | 1 | 0 | 0 | 0 | 0 | 0 |
| 405  | S   | I+R | I+R | 0 | 0 | 0 | 1 | 0 | 1 | 1 | 0 | 1 | 1 |
| 73   | S   | S   | S   | 0 | 0 | 0 | 0 | 0 | 0 | 0 | 0 | 0 | 0 |
| 131  | S   | S   | I+R | 0 | 0 | 0 | 0 | 0 | 0 | 0 | 0 | 1 | 1 |
| 349  | S   | S   | S   | 0 | 0 | 0 | 0 | 0 | 0 | 0 | 0 | 0 | 0 |
| 12   | S   | S   | S   | 0 | 0 | 0 | 0 | 0 | 0 | 0 | 0 | 0 | 0 |
| 131  | -   | S   | I+R | 0 | 0 | 0 | 0 | 1 | 0 | 0 | 0 | 1 | 1 |
| 1193 | S   | S   | I+R | 0 | 0 | 0 | 0 | 1 | 0 | 0 | 0 | 1 | 1 |
| 95   | I+R | S   | S   | 1 | 0 | 0 | 0 | 0 | 0 | 0 | 0 | 0 | 0 |
| 131  | S   | S   | S   | 0 | 0 | 0 | 0 | 1 | 0 | 0 | 0 | 1 | 0 |
| 1284 | I+R | S   | I+R | 0 | 1 | 0 | 1 | 0 | 0 | 1 | 0 | 1 | 1 |
| 144  | S   | S   | S   | 0 | 0 | 0 | 0 | 0 | 0 | 0 | 0 | 0 | 0 |
| 648  | I+R | I+R | I+R | 0 | 1 | 0 | 0 | 1 | 1 | 0 | 0 | 1 | 1 |
| 95   | S   | S   | S   | 0 | 0 | 0 | 0 | 0 | 0 | 0 | 0 | 0 | 0 |
| 73   | S   | S   | S   | 0 | 0 | 0 | 0 | 0 | 0 | 0 | 0 | 0 | 0 |
| 131  | S   | I+R | I+R | 0 | 0 | 0 | 0 | 1 | 1 | 0 | 0 | 1 | 1 |
| 404  | S   | S   | S   | 0 | 0 | 0 | 0 | 1 | 0 | 0 | 0 | 1 | 0 |

**Supplementary Figure 1: Receiver operating characteristic curves (ROC) for complete antibiotic resistance loci models with and without epidemiologic predictors for (a) 3<sup>rd</sup> generation cephalosporins (ceftriaxone), (b) fluoroquinolones (ciprofloxacin), and (c) aminoglycosides (gentamicin).**

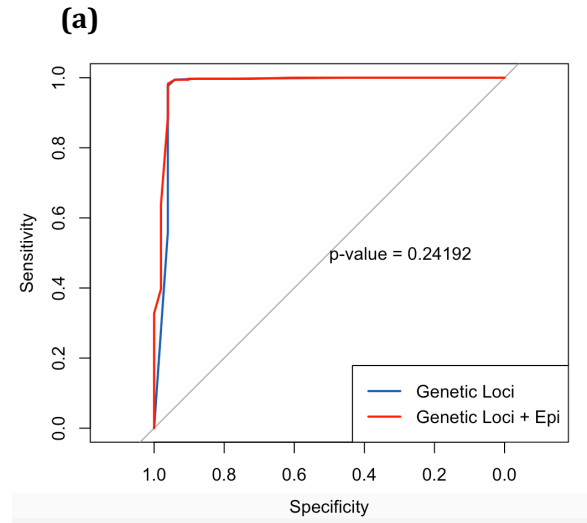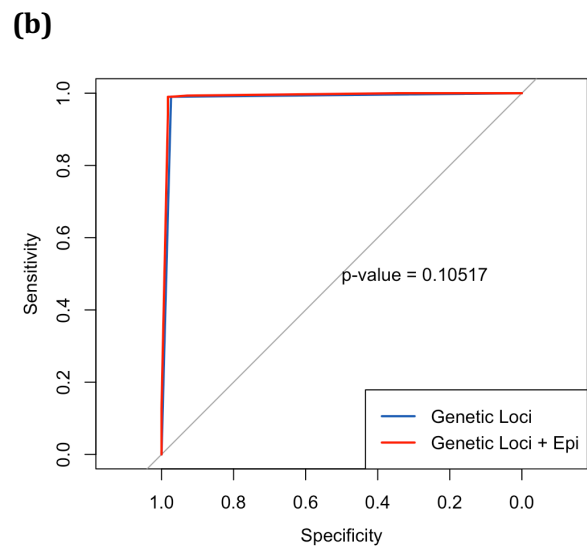

**(c)**



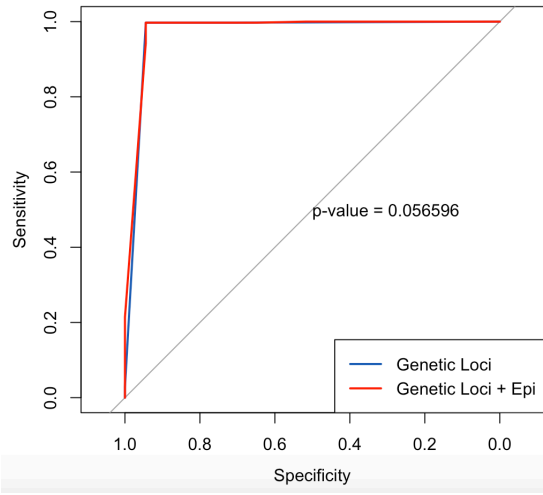

Supplement: JCM.01780-18-s0001.pdf [file JCM.01780-18-s0001.pdf]
